# Supplementary material
Source: HighWire-hosted journal article supplement (https://jnm.snmjournals.org/highwire/filestream/94973/field_highwire_adjunct_files/0/169532_Supplemental_Data.pdf)
Supplement: 169532_Supplemental_Data.pdf [file 169532_Supplemental_Data.pdf]

## SUPPLEMENTAL TABLE 1

### Image Acquisition Protocol

| Scan Acquisitions | Min /bed position | No. of bed positions | Vertex to mid thigh |
|-------------------|-------------------|----------------------|---------------------|
| Attenuation CT 1  |                   |                      |                     |
| 1                 | 1                 | 6-7                  | Vertex to mid thigh |
| 2                 | 2                 | 6-7                  | Vertex to mid thigh |
| 3                 | 5                 | 6-7                  | Vertex to mid thigh |
| 4                 | 5                 | 6-7                  | Vertex to mid thigh |
| Gap               |                   |                      |                     |
| Attenuation CT 2  |                   |                      |                     |
| 5                 | 7                 | 6-7                  | Vertex to mid thigh |
| 6                 | 7                 | 6-7                  | Vertex to mid thigh |

Each scan was 6-7 bed positions, with the inferior border set to mid-thigh and the superior border set at the vertex. The acquisition for each bed position was 1, 2, 5, 5, 7 and 7 min for the six time points after radioligand injection.

**A**

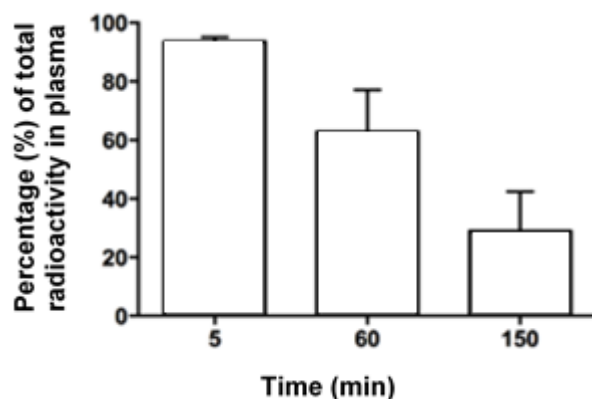

**B**

| Time (min) | Percentage (%) Total Radioactivity |                     | Percentage (%) of Total Radioactivity |     |     |
|------------|------------------------------------|---------------------|---------------------------------------|-----|-----|
|            | Parent Radioligand                 | Total Metabolite(s) | Individual metabolites                |     |     |
|            |                                    |                     | I                                     | II  | III |
| 5          | 94                                 | 5.5                 | 5.5                                   | 0   | 0   |
| 10         | 92                                 | 7.6                 | 7.6                                   | 0   | 0   |
| 15         | 90                                 | 9.7                 | 9.7                                   | 0   | 0   |
| 30         | 84                                 | 15.6                | 15.6                                  | 0   | 0   |
| 60         | 68                                 | 32                  | 22.5                                  | 3.1 | 6   |
| 90         | 55                                 | 45                  | 35.1                                  | 4   | 6.7 |
| 150        | 34                                 | 66                  | 45                                    | 6.1 | 15  |

**Supplemental Figure 1.** (A) Percentage (%) of total radioactivity in the form of parent radioligand remaining in plasma at 5, 60 and 150 min. (B) Table summarizing proportions of parent radioligand and metabolite(s) expressed as percentage (%) of total radioactivity. The unidentified metabolites I, II and III respectively eluted at the following retention times (min) 7, 5.3 and 4. Parent radioligand retention time is 10 min.

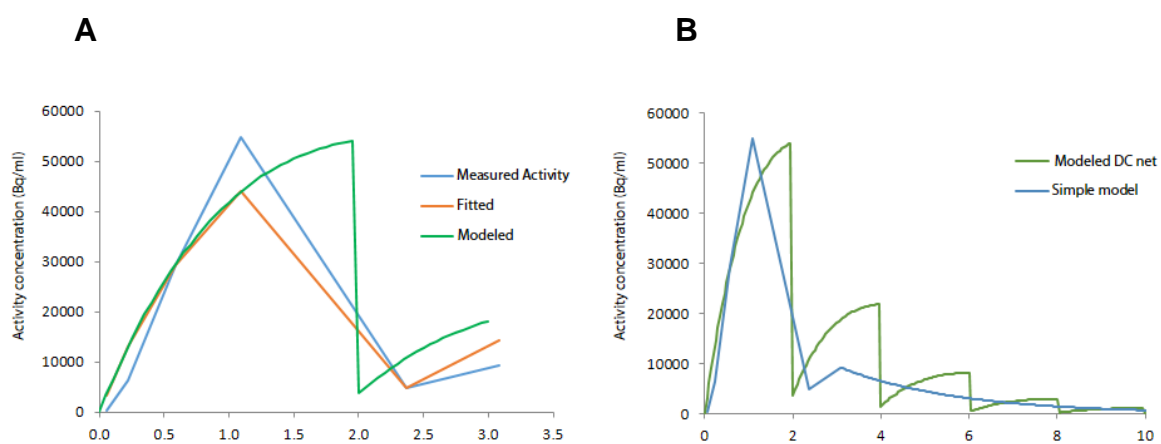

**Supplemental Figure 2. Bladder time-activity curves for patient 1 using the 3 parameter fit model.**

Total bladder activity was estimated as previously (14). Graph (A) illustrates the bladder model in patient 1, with measured and fitted curves, and resulting modelled bladder net activity using a 2 h void interval. Graph (B) shows the modelled bladder net activity compared to the measured data extrapolated for decay beyond the last measured point.
